# Supplementary material for: Comparative genomic analysis revealed genetic divergence between Bifidobacterium catenulatum subspecies present in infant versus adult guts
Source: PubMed Central journal article supplement (PMC9202165; doi:10.1186/s12866-022-02573-3), 2022-06-16

A

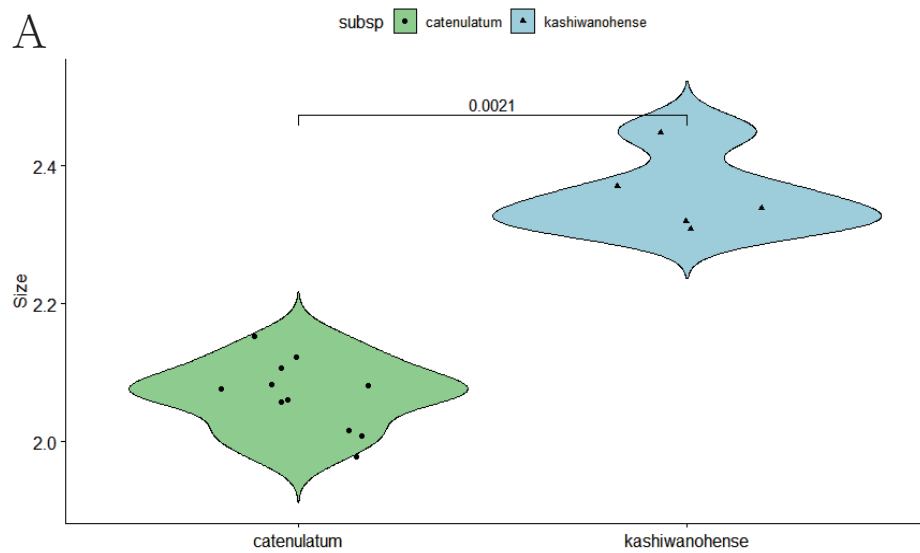

B

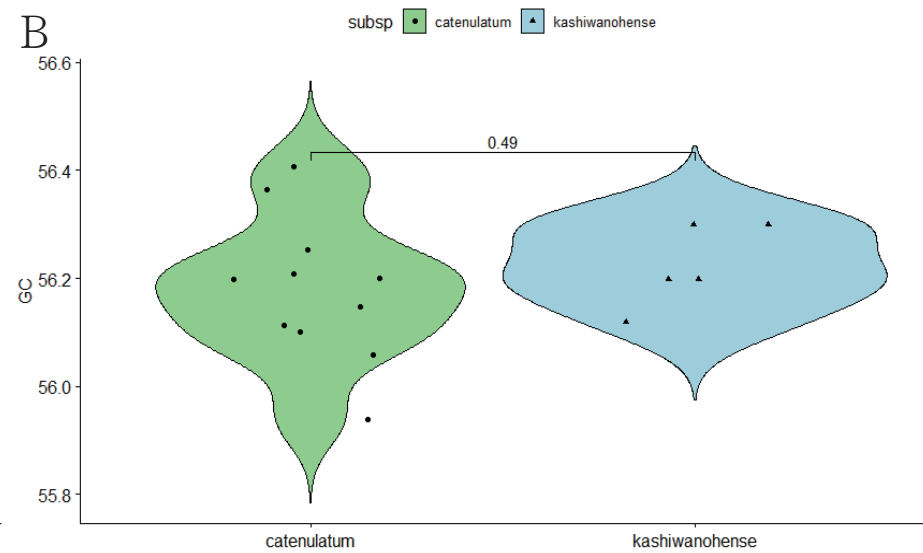

C

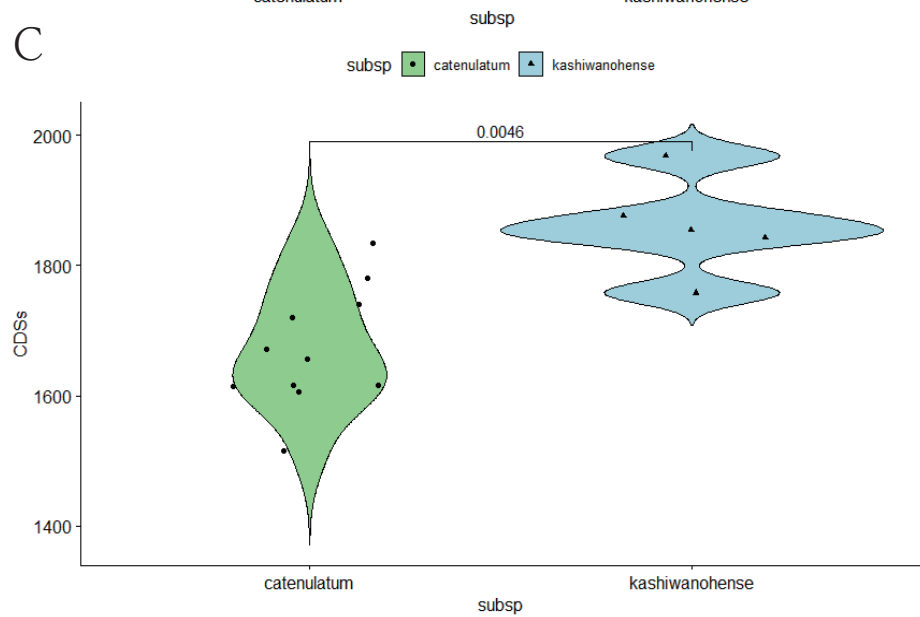

D

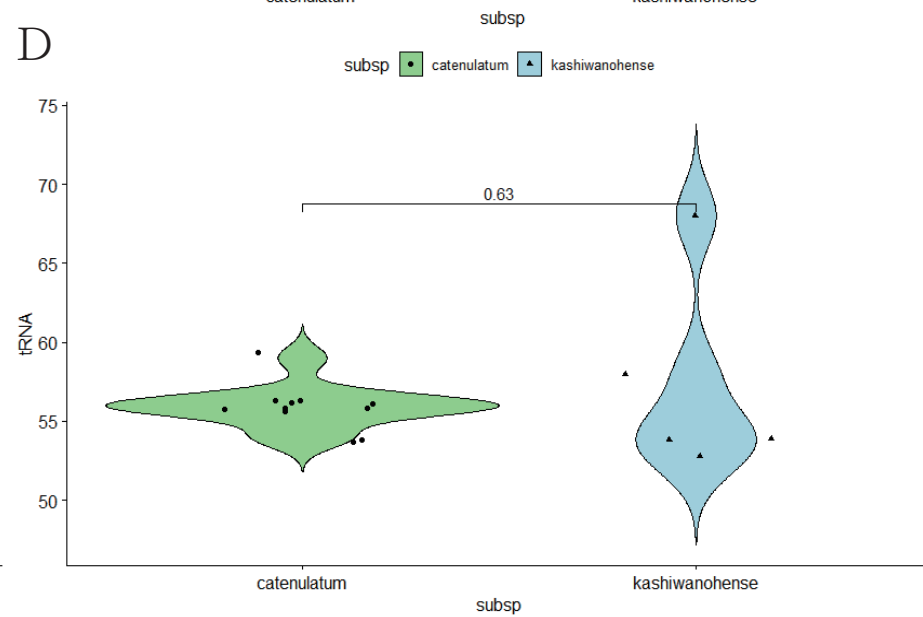

Supplement: 12866_2022_2573_MOESM4_ESM.pdf [file 12866_2022_2573_MOESM4_ESM.pdf]
