# Supplementary material for: Comparative genomic analysis revealed genetic divergence between Bifidobacterium catenulatum subspecies present in infant versus adult guts
Source: PubMed Central journal article supplement (PMC9202165; doi:10.1186/s12866-022-02573-3), 2022-06-16

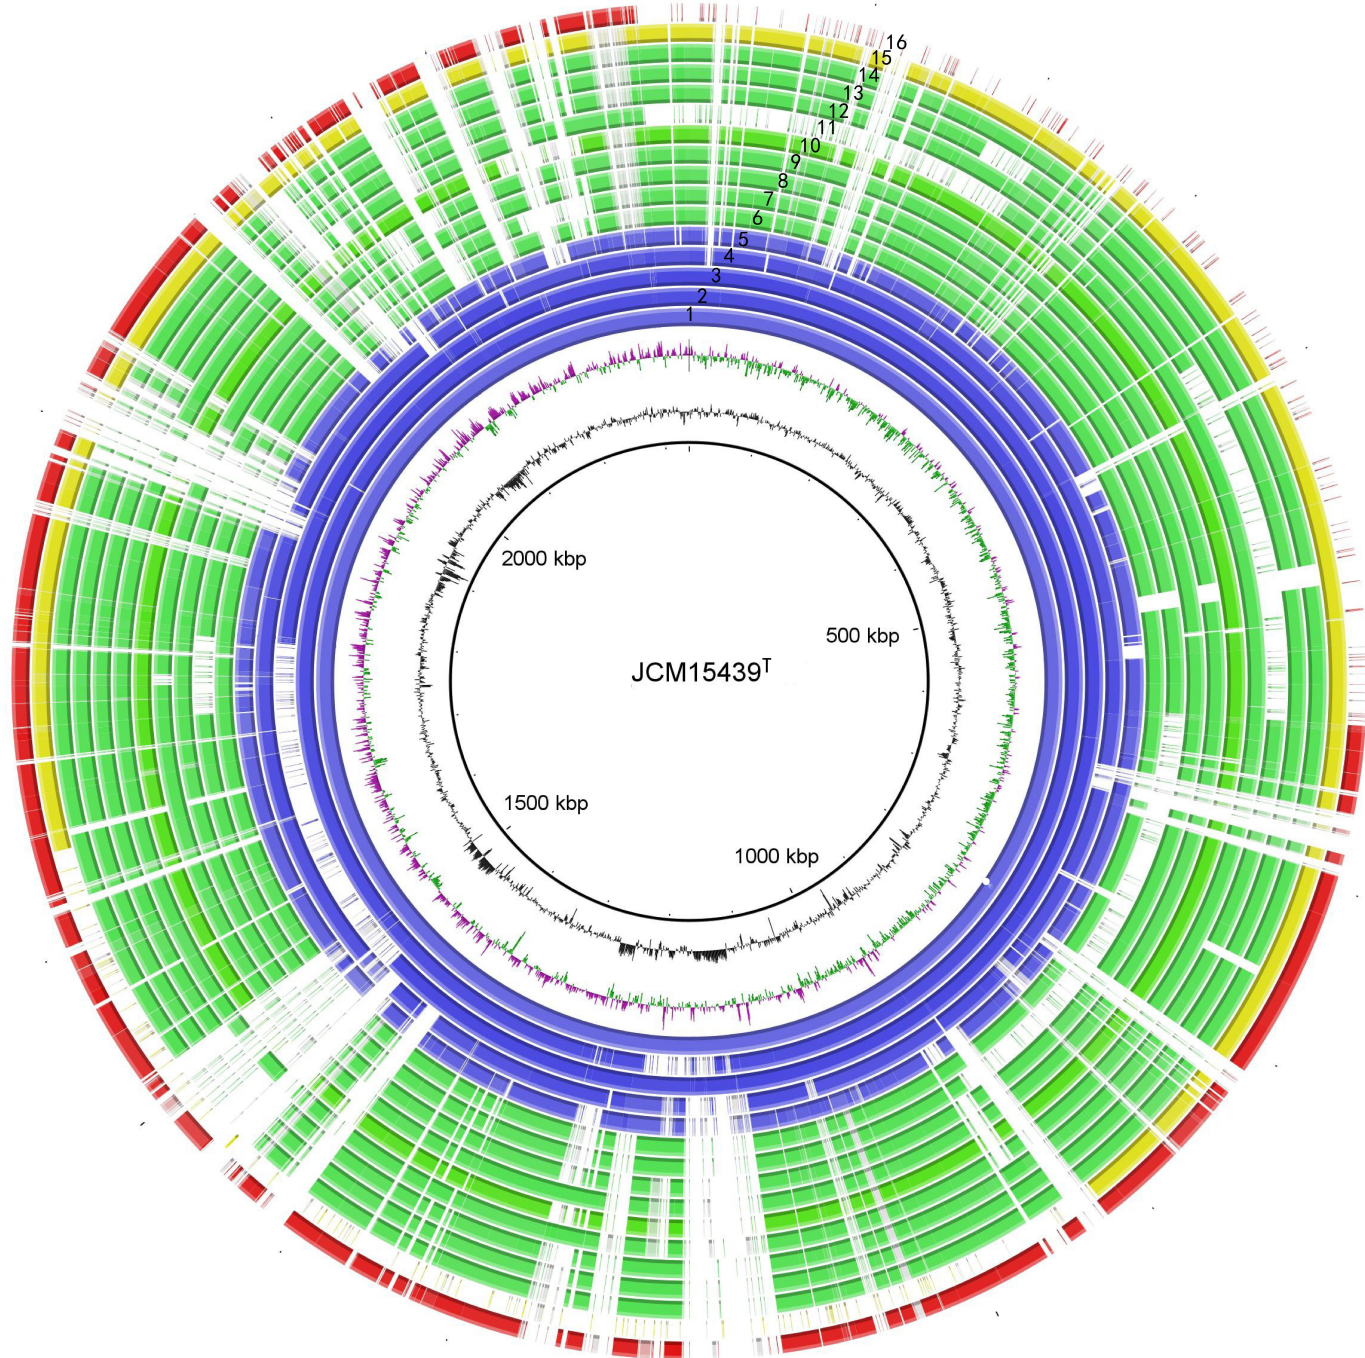

■ GC Content

GC Skew

■ GC Skew(-)

■ GC Skew(+)

*B. catenulatum* subsp. *kashiwanohense*

■ 100% identity

■ 90% identity

■ 70% identity

*B. catenulatum* subsp. *catenulatum*

■ 100% identity

■ 90% identity

■ 70% identity

IMAUFB085

■ 100% identity

■ 90% identity

■ 70% identity

IMAUFB087

■ 100% identity

■ 90% identity

■ 70% identity

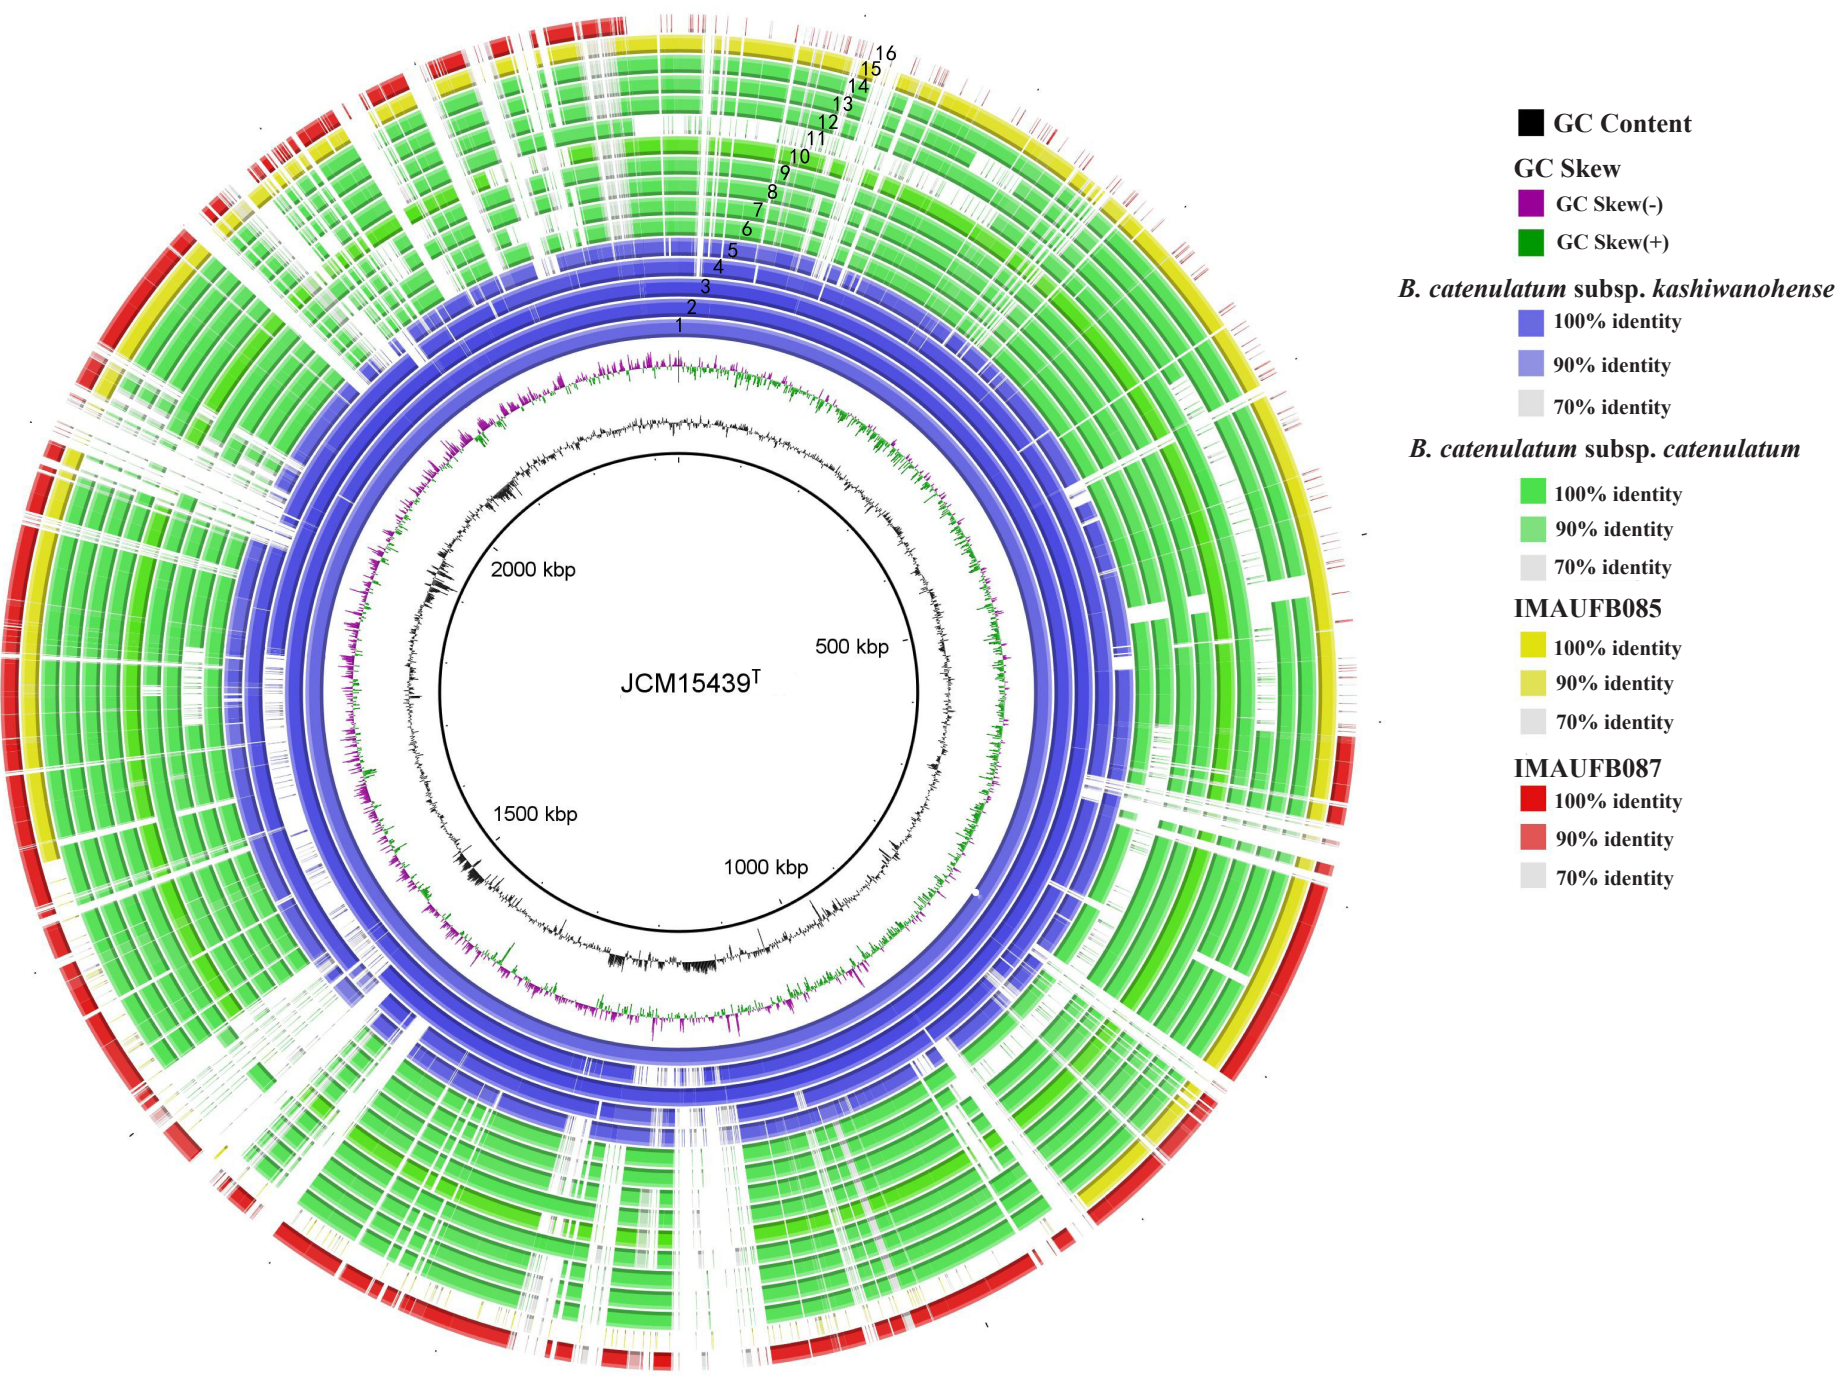

Supplement: 12866_2022_2573_MOESM5_ESM.pdf [file 12866_2022_2573_MOESM5_ESM.pdf]
